# Supplementary material for: Silicon-pyrene/perylene hybrids as molecular rectifiers
Source: Royal Society of Chemistry journal article supplement (doi:10.1039/c4cp04044a), 2014-11-26

**Figure SL-1.** CVs indicating electrografting of C-11 alkene molecules on silicon ( $n^{++}$ ) wafers at different scans. The deposition was carried out by CV at a scan rate of 0.05 V/s under  $N_2$  atmosphere using Si wafers as the WE, Pt as the CE and Ag/AgCl as the RE, and 0.1 M  $Bu_4NP$  as the electrolyte, using the alkene (1  $\mu M$ ) in dry  $CH_2Cl_2$ .

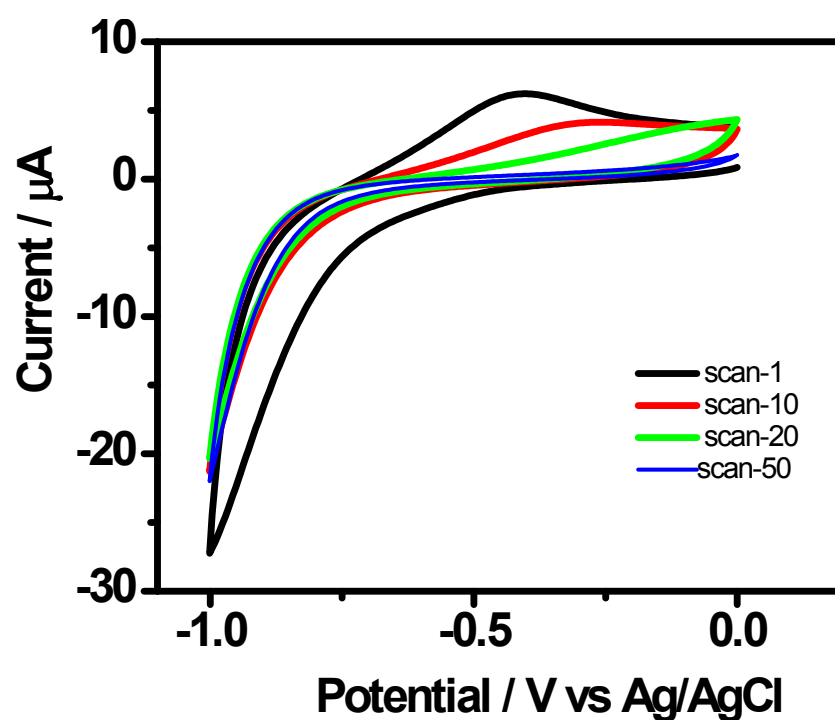

**Figure SL-2.** AFM images ( $1\ \mu\text{m} \times 1\ \mu\text{m}$ ) for the monolayers of (a) **3**; (b) **4a**; (c) **4b**, electro-grafted on silicon ( $\text{n}^{++}$ ) wafers. data of the monolayers of (a) **3** (b) **4a** (c) **4b**, electro-grafted on silicon ( $\text{n}^{++}$ ) wafers.

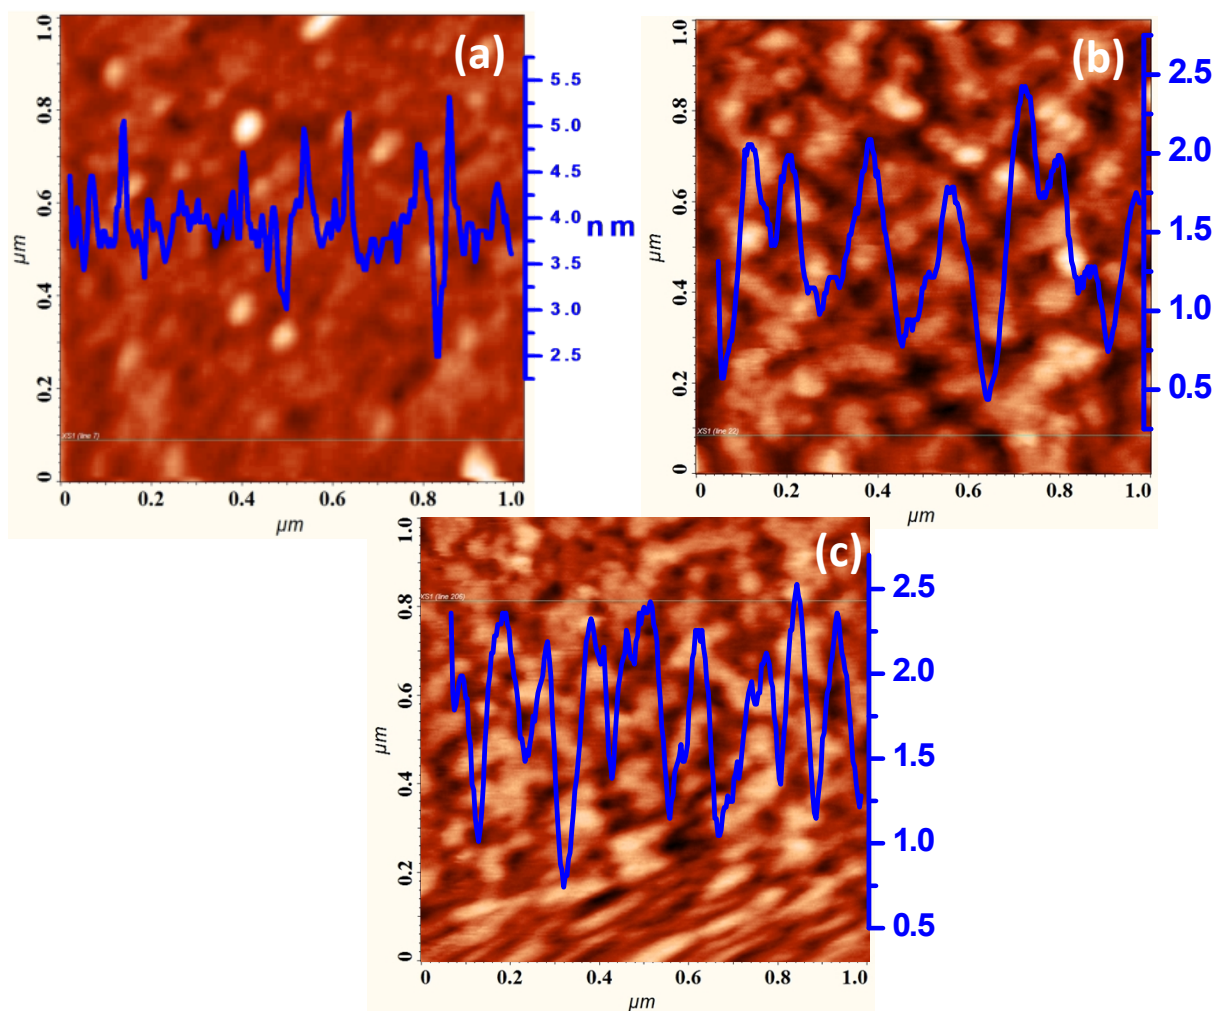

**Figure SL-3.** XPS data of the monolayers of (a) **3** (b) **4a** (c) **4b**, electro-grafted on silicon ( $n^{++}$ ) wafers. Insets: expanded Si 2p peak.

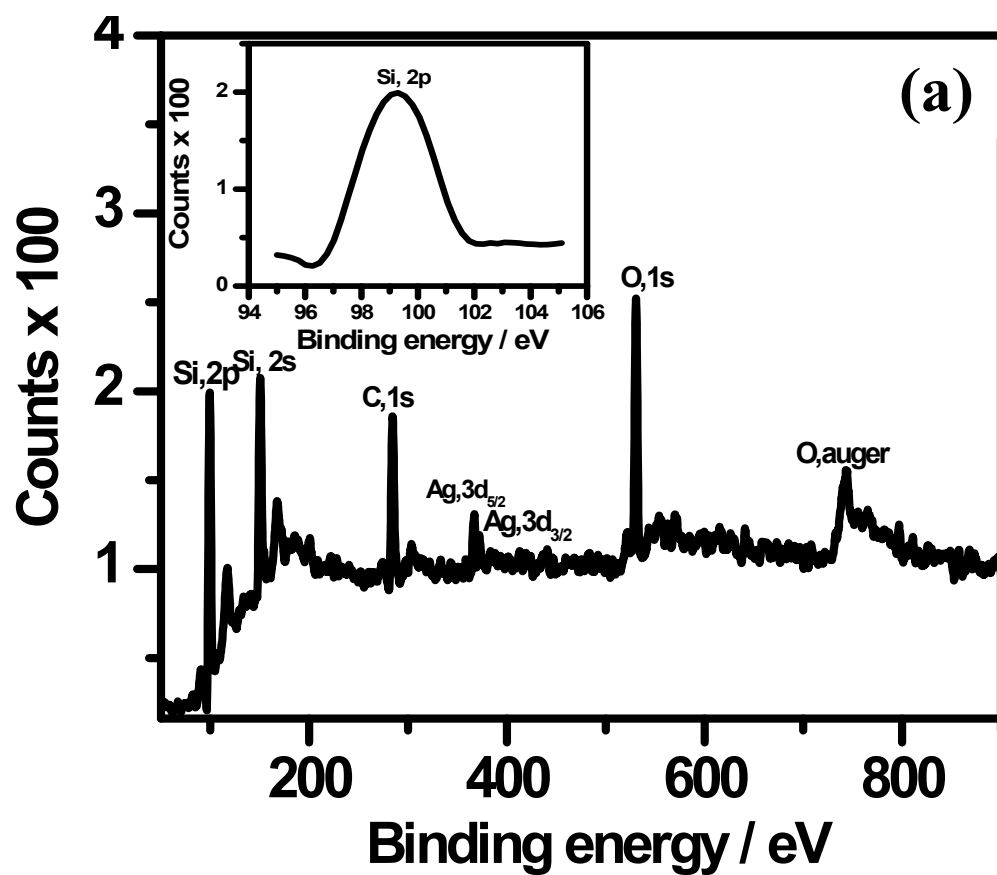

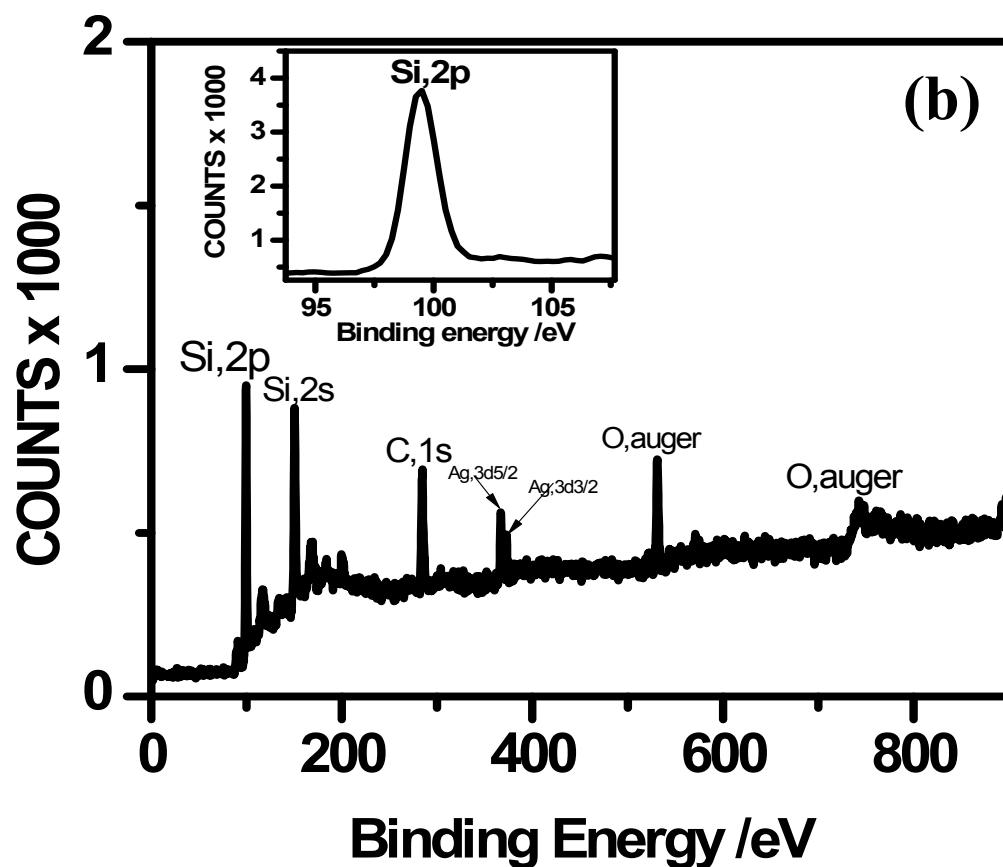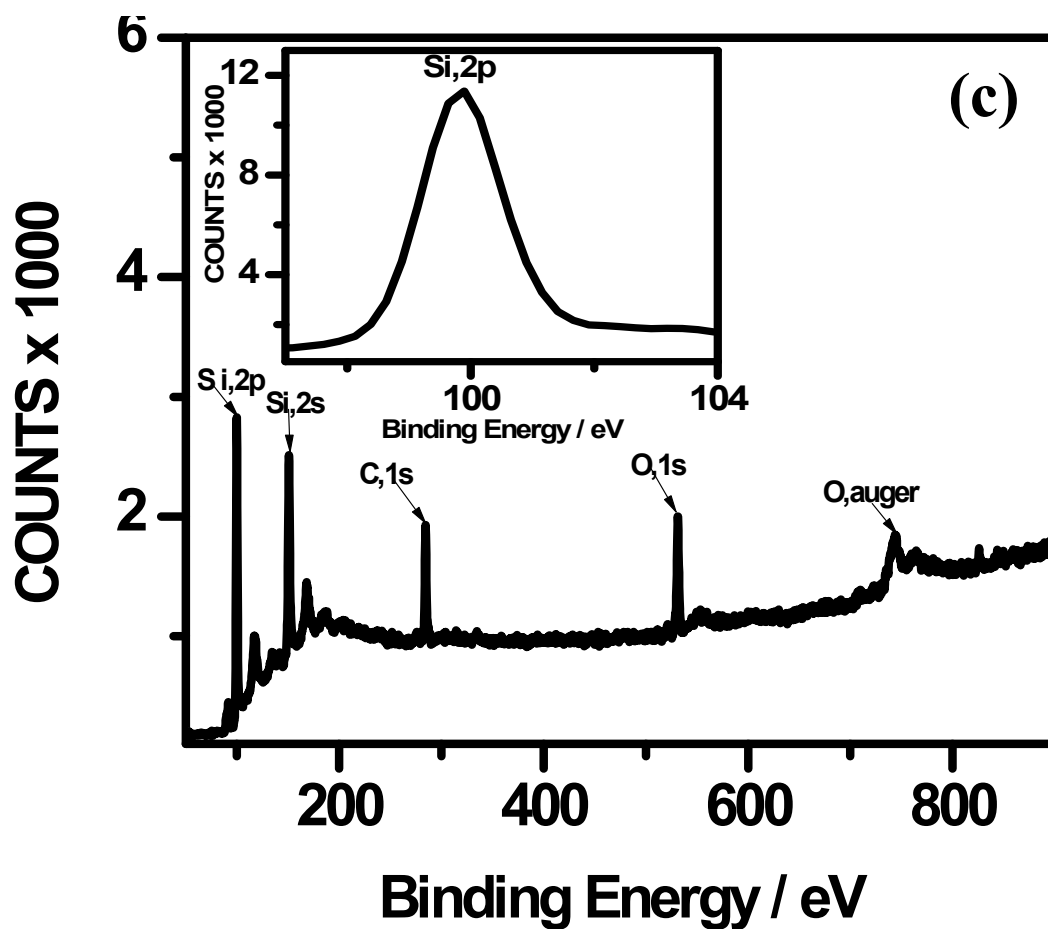

**Figure SL-4.** Experimental  $I$ - $V$  characteristics of devices (a) Hg/ C-11alkyl monolayers/Si(n<sup>++</sup>) (b) Hg/ undeposited Si(n<sup>++</sup>).

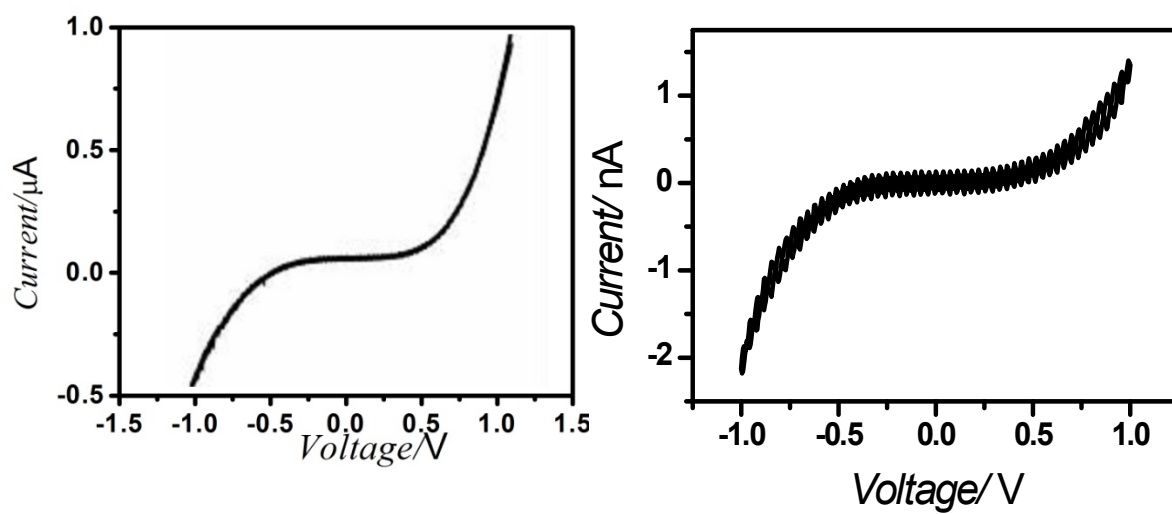

Supplement: c4cp04044a1.pdf [file c4cp04044a1.pdf]
